# Supplementary material for: Patterns of carbon processing at the seafloor: the role of faunal andmicrobial communities in moderating carbon flows
Source: Copernicus journal article supplement (doi:10.5194/bg-13-4343-2016), 2016-08-04
Supplement: Supplementary file 1 [file bg-13-4343-2016-supplement.pdf]

Supplement of Biogeosciences, 13, 4343–4357, 2016  
<http://www.biogeosciences.net/13/4343/2016/>  
doi:10.5194/bg-13-4343-2016-supplement  
© Author(s) 2016. CC Attribution 3.0 License.

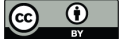

*Supplement of*

## **Patterns of carbon processing at the seafloor: the role of faunal and microbial communities in moderating carbon flows**

**Clare Woulds et al.**

*Correspondence to:* Clare Woulds (c.woulds@leeds.ac.uk)

The copyright of individual parts of the supplement might differ from the CC-BY 3.0 licence.

1 **Supplementary Information**

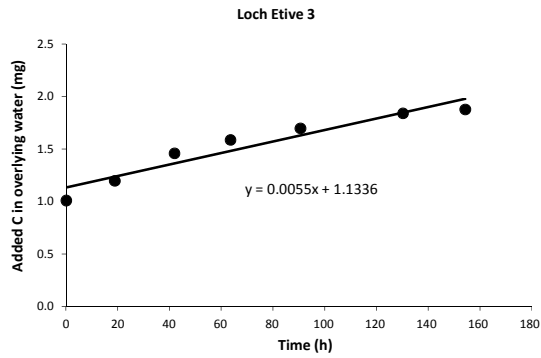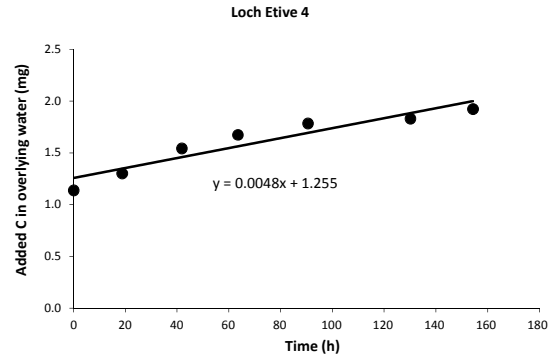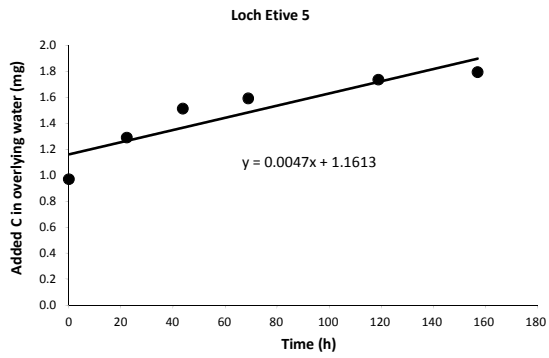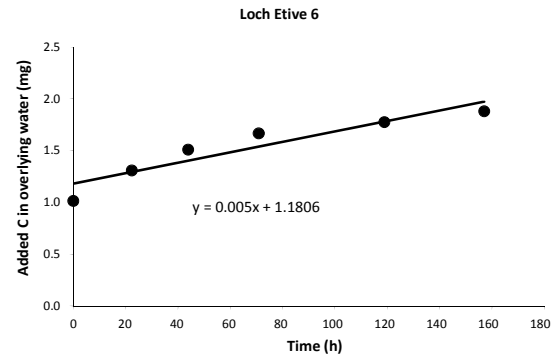

2

3 **A**

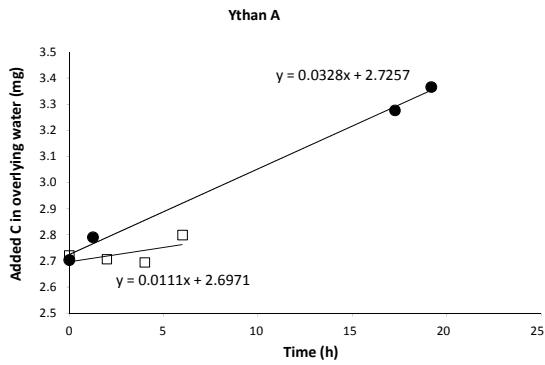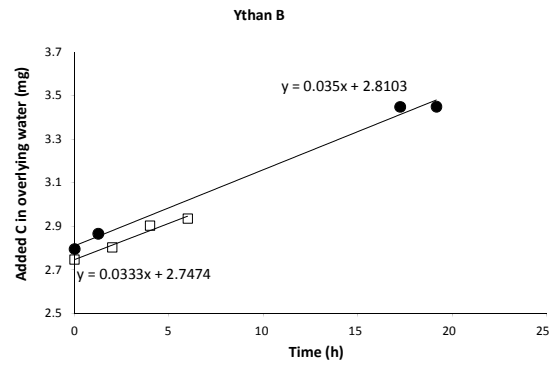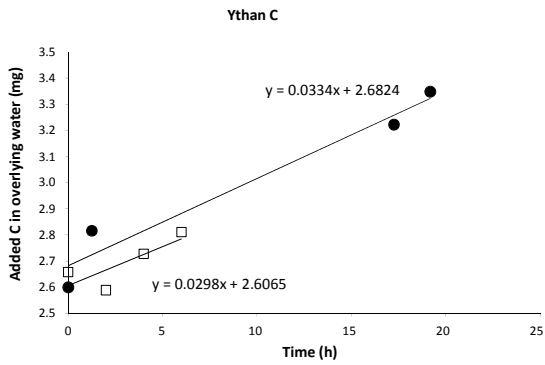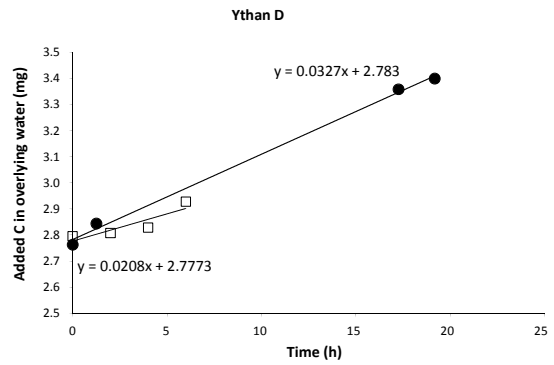

4

5 **B**

6 **Figure S1. Quantity of added C over time in experimental chamber water columns, with regression lines**  
7 **and equations used for calculating respiration rates, for a) Loch Etive and b) the Ythan sand flat. Note**  
8 **that the chamber surface area was different for the two study sites (see methods).**

9
